# Supplementary material for: Graph theory reveals amygdala modules consistent with its anatomical subdivisions
Source: PubMed Central journal article supplement (PMC5663902; doi:10.1038/s41598-017-14613-4), 2017-10-31
Supplement: 41598_2017_14613_MOESM1_ESM.pdf [file 41598_2017_14613_MOESM1_ESM.pdf]

## Graph theory reveals amygdala modules consistent with its anatomical subdivisions

Elisabeth C. Caparelli<sup>1</sup>, Thomas J. Ross<sup>1</sup>, Hong Gu<sup>1</sup>, Xia Liang<sup>1,2</sup>, Elliot A. Stein<sup>1</sup>, and Yihong Yang<sup>1</sup>

1. Neuroimaging Research Branch, National Institute on Drug Abuse, National Institutes of Health, Baltimore, Maryland, USA
2. Research Center of Basic Space Science, Harbin Institute of Technology, Harbin, China

Corresponding author:

Elisabeth C. Caparelli, Ph.D.

Neuroimaging Research Branch

Section of MRI and Spectroscopy

NIDA-NIH

BRC, room 7A514

251 Bayview Blvd

Baltimore, MD, 21224

ph: 443-740-2288

e-mail: [elisabeth.caparelli@nih.gov](mailto:elisabeth.caparelli@nih.gov)

### Supplementary Material

Table 1S: Locations of the significant clusters obtained from the pairwise comparisons between the functional connectivity maps obtained for the amygdala subdivisions. Results are corrected for multiple comparisons,  $p_{\text{corrected}} < 0.01$ ; cluster's peak locations are in MNI coordinates, location for cerebellum subdivision from MNI-SUIT space (AFNI-SUIT atlas (Diedrichsen et al. 2009)), cluster size in number of voxels, XL(R) = X left (right), X = CM, LB, SF

| Subdivision | x   | y    | z   | Brain region                   | cluster size | Z-score |
|-------------|-----|------|-----|--------------------------------|--------------|---------|
| CML>LBL     | -20 | -10  | -12 | left amygdala                  | 38751        | >13     |
|             | 30  | -6   | -20 | right amygdala                 | 2910         | -12.7   |
|             | -38 | -54  | 46  | left inferior parietal lobule  | 1339         | 8.2     |
|             | 36  | -24  | 56  | right precentral gyrus         | 1124         | -7      |
|             | 14  | -26  | 74  | right precentral gyrus         | 771          | -6.8    |
|             | -48 | -22  | 58  | left postcentral gyrus         | 607          | -5.7    |
|             | -40 | 42   | 12  | left middle frontal gyrus      | 601          | 5.7     |
|             | 14  | -100 | -2  | right cuneus                   | 597          | 6.6     |
|             | -10 | -66  | 34  | left precuneus                 | 574          | 6.3     |
| CML>SFL     | -20 | -10  | -10 | left amygdala                  | 54076        | >13     |
|             | -46 | -74  | 6   | left middle occipital gyrus    | 3756         | -8.4    |
|             | 4   | 18   | 38  | right middle cingulate cortex  | 3532         | 10.5    |
|             | 0   | 40   | -22 | left orbital frontal gyrus     | 2217         | -10.1   |
|             | 26  | 48   | 20  | right superior frontal gyrus   | 2152         | 8.5     |
|             | -66 | -22  | 24  | left postcentral gyrus         | 1397         | 7.1     |
|             | 68  | -32  | 38  | right inferior parietal lobule | 1223         | 7.4     |
|             | -8  | -68  | 38  | left precuneus                 | 782          | 8.2     |
| LBL>SFL     | -32 | -4   | -26 | left amygdala                  | 9198         | >13     |
|             | 0   | -20  | 62  | left medial frontal gyrus      | 5048         | -7.4    |
|             | -28 | 54   | 16  | left middle frontal gyrus      | 2472         | 6.8     |
|             | -22 | -86  | -36 | left cerebellum (Crus II)      | 1456         | 6.7     |
|             | 26  | -72  | -30 | right cerebellum (Crus I)      | 1339         | 8       |

|                   |     |     |                            |                                |       |      |
|-------------------|-----|-----|----------------------------|--------------------------------|-------|------|
| <b>CMR&gt;LBR</b> | 28  | 48  | 16                         | right middle frontal gyrus     | 1041  | 6.9  |
|                   | -34 | -84 | 40                         | left precuneus                 | 746   | -5.9 |
|                   | 52  | -66 | 28                         | right middle temporal gyrus    | 588   | -5.6 |
|                   | 54  | -42 | 32                         | right supramarginal gyrus      | 491   | 6.1  |
|                   | -64 | -48 | 28                         | left supramarginal gyrus       | 427   | 5.7  |
|                   | -38 | 32  | -12                        | left inferior frontal gyrus    | 317   | -9.3 |
|                   | 18  | 10  | 66                         | right superior frontal gyrus   | 308   | 5.6  |
|                   | 42  | -64 | -14                        | right inferior occipital gyrus | 9815  | -6.9 |
|                   | 32  | -4  | -26                        | right amygdala                 | 4786  | <-13 |
|                   | -30 | -6  | -24                        | left amygdala                  | 977   | -12  |
|                   | -22 | -64 | -26                        | left cerebellum (VI)           | 424   | 6.7  |
|                   | 46  | -6  | -44                        | right inferior temporal gyrus  | 394   | -5.7 |
|                   | -28 | 30  | 48                         | left middle frontal gyrus      | 386   | -5.9 |
|                   | 0   | 40  | 14                         | left anterior cingulate cortex | 311   | 5.6  |
|                   | -40 | -40 | 58                         | left inferior parietal lobule  | 302   | -4.6 |
| 2                 | -24 | 68  | right medial frontal gyrus | 293                            | -4.5  |      |
| <b>CMR&gt;SFR</b> | 24  | -4  | -22                        | right amygdala                 | 40272 | <-13 |
|                   | -20 | -82 | -30                        | left cerebellum (Crus I)       | 3910  | 7.9  |
|                   | 2   | 38  | 18                         | right anterior cingulate       | 1716  | 7.8  |
|                   | 60  | -34 | 34                         | right inferior parietal lobule | 848   | 9    |
|                   | -16 | 38  | 46                         | left superior frontal gyrus    | 843   | -7.9 |
|                   | -66 | -36 | 38                         | left inferior parietal lobule  | 737   | 7.2  |
|                   | 4   | -20 | 28                         | right middle cingulate cortex  | 478   | 6.7  |
|                   | -38 | 50  | 22                         | left middle frontal gyrus      | 328   | 5.4  |
|                   | 36  | 46  | 36                         | right superior frontal gyrus   | 315   | 5.2  |
| <b>LBR&gt;SFR</b> | 12  | -20 | 76                         | right precentral gyrus         | 8470  | -7.7 |
|                   | 14  | -4  | -18                        | right amygdala                 | 4539  | <-13 |
|                   | 4   | -64 | 26                         | right cingulate gyrus          | 1533  | -6.6 |
|                   | 24  | -72 | -26                        | right cerebellum (VI)          | 1231  | 7.2  |
|                   | 24  | 50  | 16                         | right superior frontal gyrus   | 804   | 6.1  |
|                   | -28 | 52  | 24                         | left middle frontal gyrus      | 763   | 5.7  |
|                   | -20 | -84 | -32                        | left cerebellum (Crus I)       | 747   | 8    |
|                   | -56 | -48 | 36                         | left inferior parietal lobule  | 731   | 6.9  |
|                   | 52  | -66 | 28                         | right middle temporal gyrus    | 663   | -5.9 |
|                   | 18  | 8   | 64                         | right middle frontal gyrus     | 548   | 6.6  |
|                   | 58  | -34 | 36                         | right inferior parietal lobule | 485   | 7    |
|                   | -40 | -70 | 34                         | left precuneus                 | 330   | -5.5 |
|                   | -30 | -6  | -20                        | left amygdala                  | 325   | 9.9  |

Figure 1S: Pair-wise comparison of the FC maps obtained for the amygdala subdivisions, CM, LB and SF. MNI standard space; radiological convention; significance:  $p < 0.05$  FWE corrected

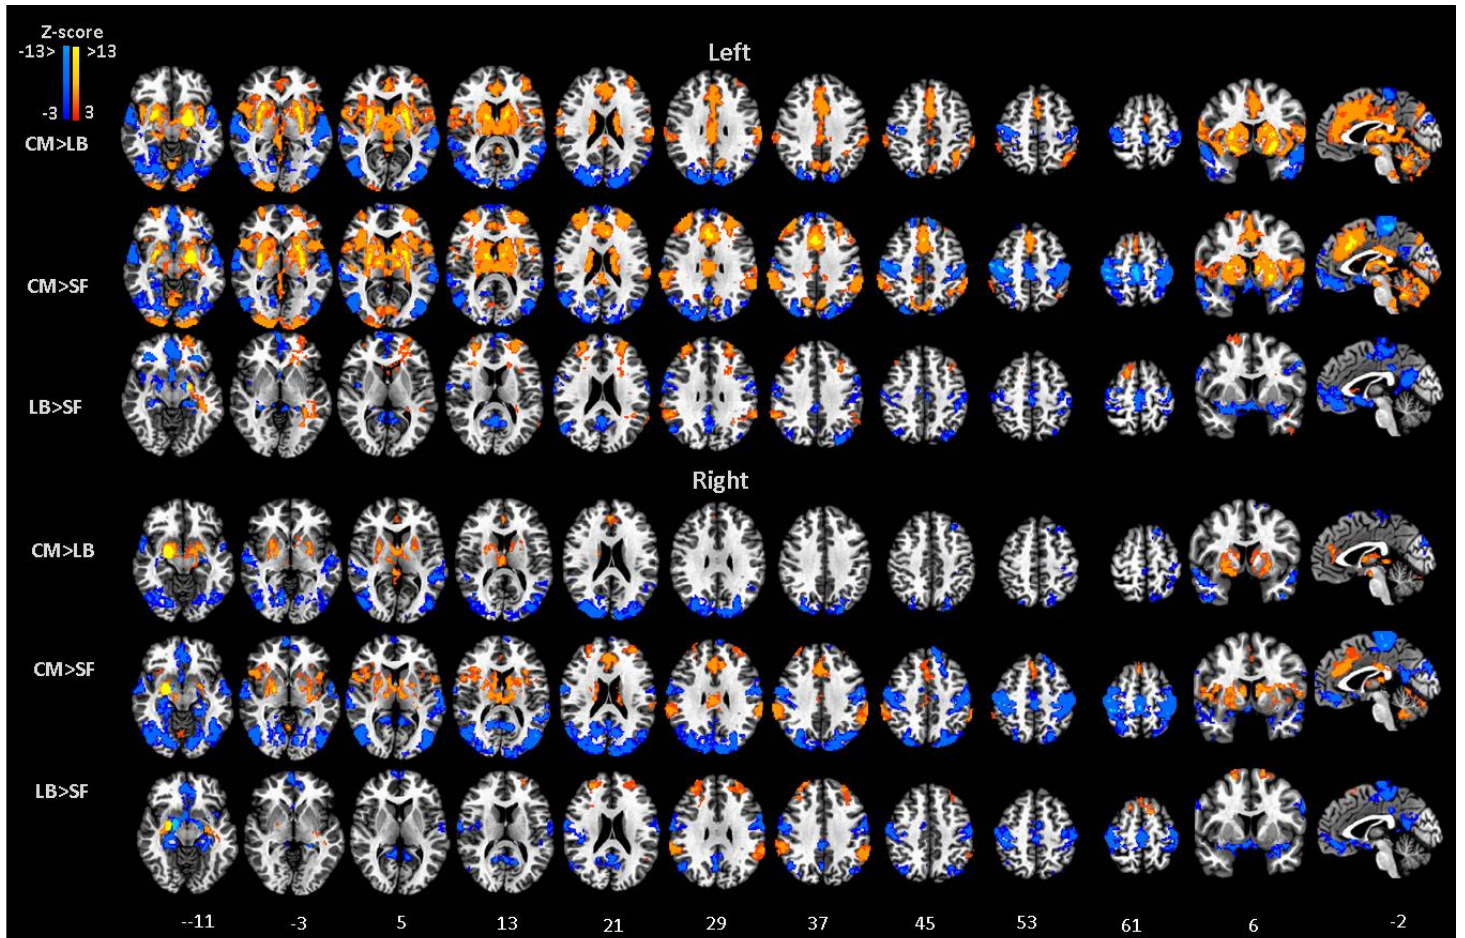

Figure 2S: FC maps for the amygdala subdivisions, CM, LB and SF, calculated for the four different sessions. MNI standard space; radiological convention; significance:  $p < 0.05$  FWE corrected

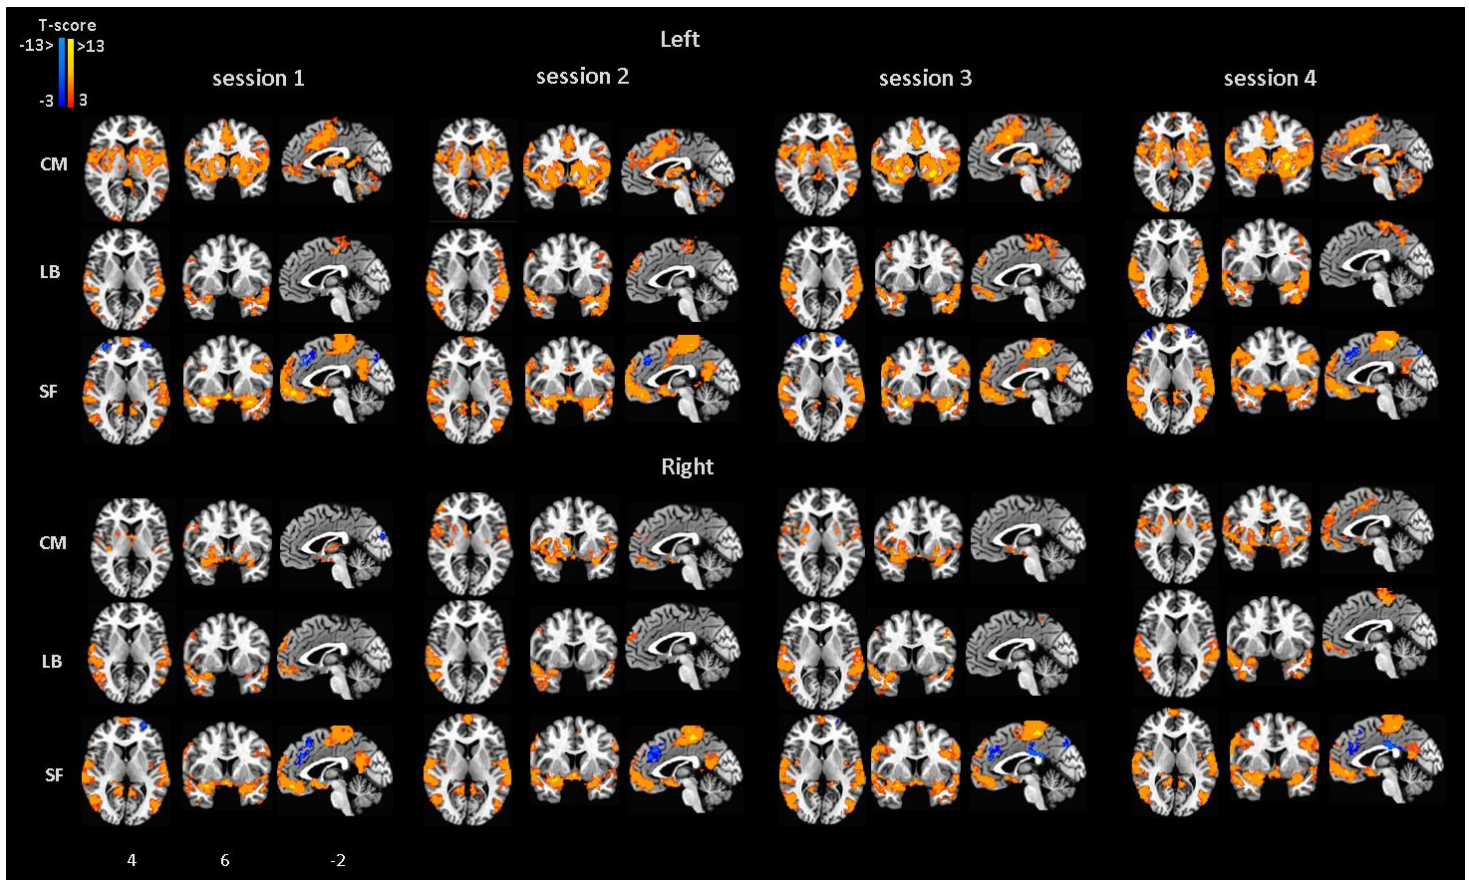

Figure 3S: A) Two-way ANOVA results comparing the FC maps calculated for each amygdala subdivision (seed location) and for the four different sessions. A significant main effect of seed location is observed; there were no significant main effects of session or interactions. significance:  $p < 0.05$  FWE corrected; B) Intraclass correlation (ICC) maps computed from the FC maps obtained for each amygdala subdivision, CM, LB and SF, calculated over the four sessions. MNI standard space; radiological convention.

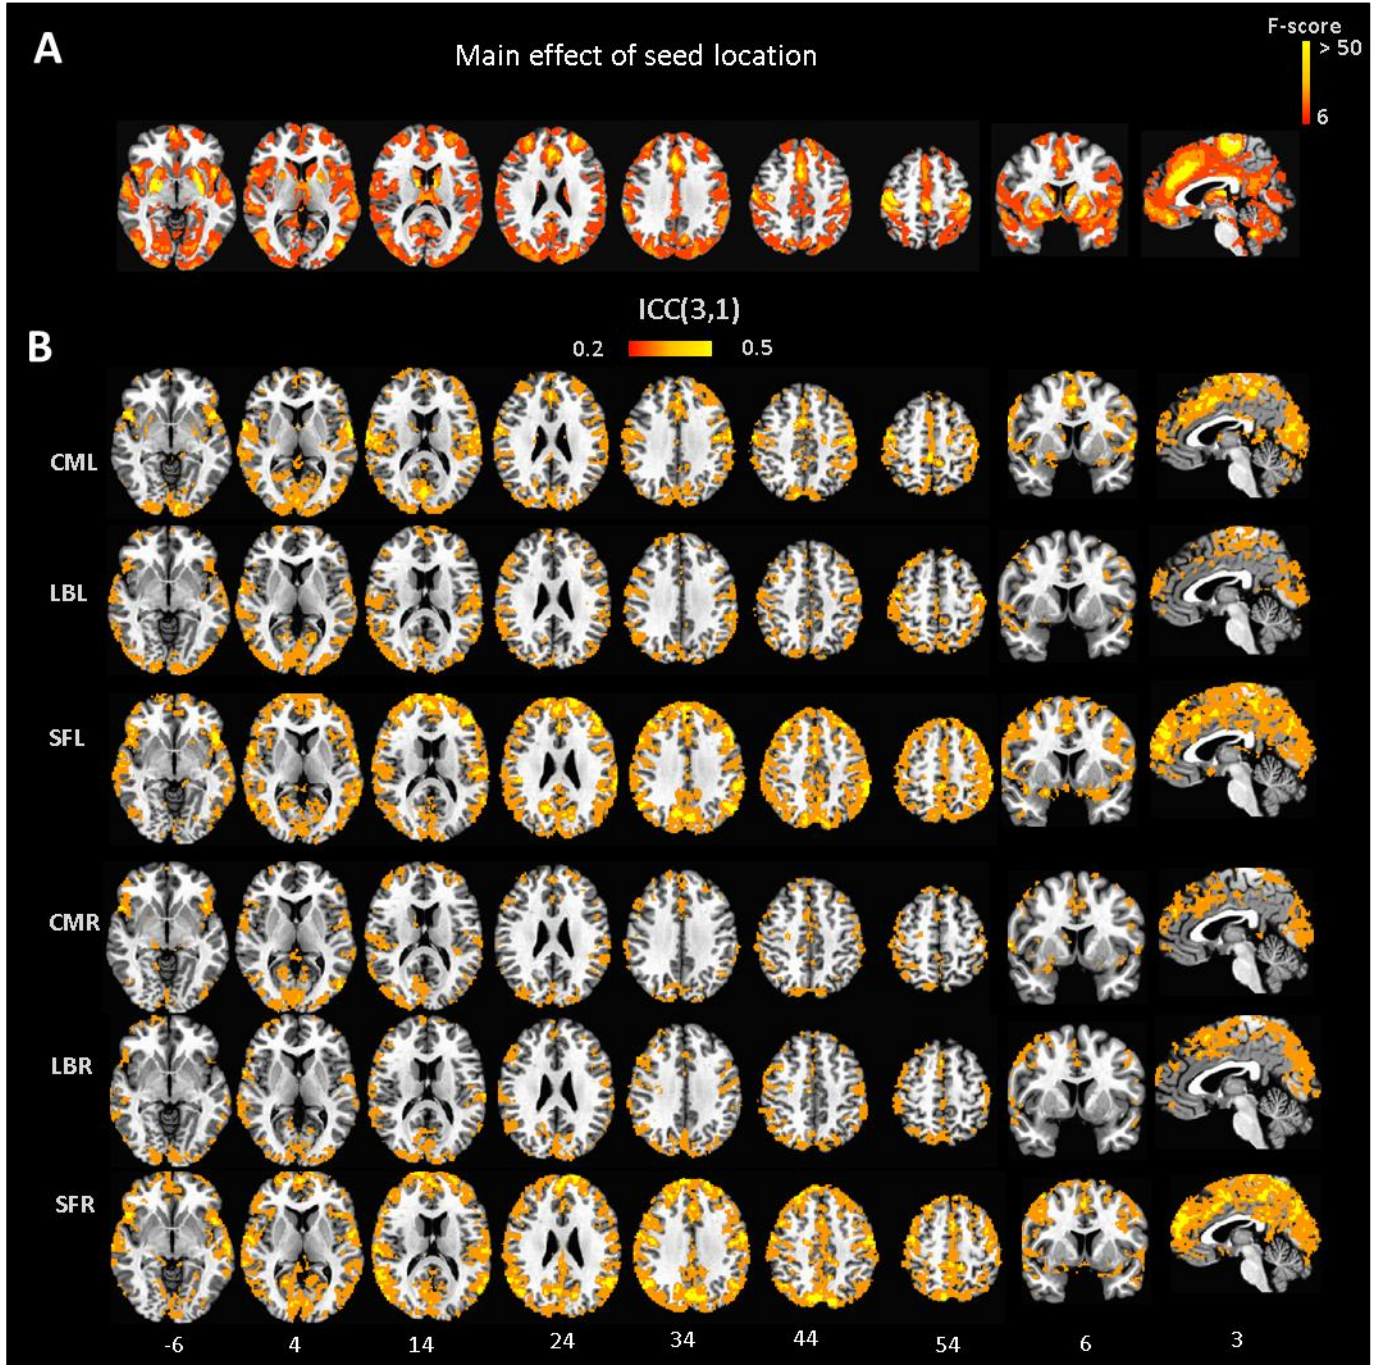

Figure 4S: Modularity results for rsfMRI acquired with the regular EPI (Reg-EPI: TE/TR 27/2000 ms, inplane resolution  $3.4 \times 3.4 \times 4.0 \text{ mm}^3$ , 39 oblique slices, 240 images) and multi-band EPI (MB-EPI: TE/TR 27/500 ms, inplane resolution  $3.4 \times 3.4 \times 4.0 \text{ mm}^3$ , 39 oblique slices, 900 images, MB acceleration factor = 5 ), for 18 healthy volunteers (9 males and 9 females, 20 to 49 years of age), who gave written informed consent approved by the National Institute on Drug Abuse institutional review board panel. Images were acquired at a 3 Tesla Trio Siemens system using the 32-channels head coil.

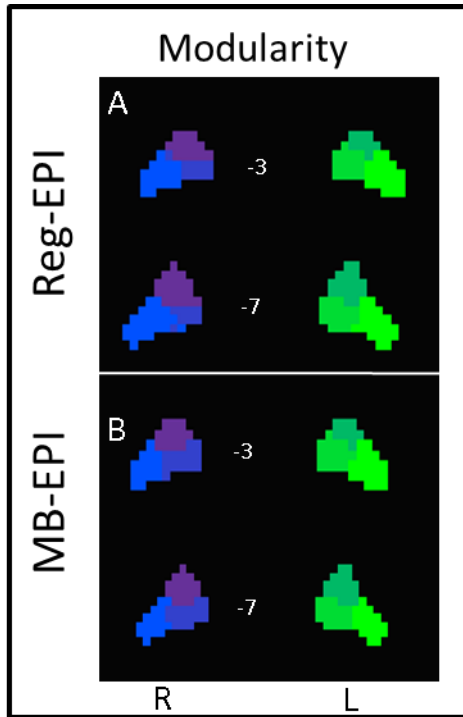

Figure 5S: ROI analysis correlating the mean BOLD signal at the CMR with the mean positive and significant ( $p < 0.05$ ) Fisher transformed correlation values of the CMR connectivity pathway (as Fig. 4C), but removing the two possible outliers ( $z > 0.13$ ).

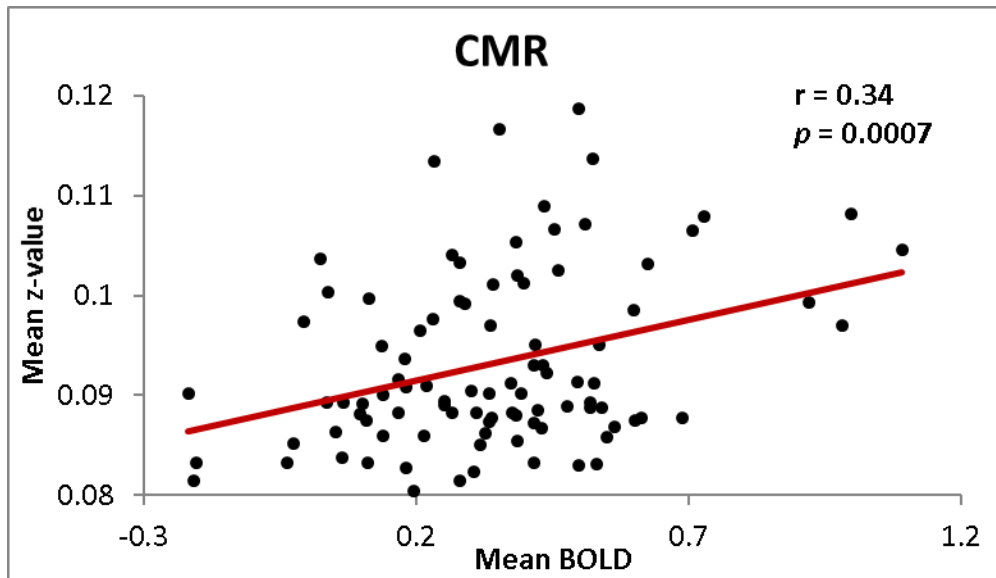

References:

Diedrichsen J, Balsters JH, Flavell J, Cussans E, Ramnani N (2009) A probabilistic MR atlas of the human cerebellum *Neuroimage* 46:39-46 doi:10.1016/j.neuroimage.2009.01.045
